# Supplementary material for: Combined neural network/Phillips–Tikhonov approach to aerosol retrievals over land from the NASA Research Scanning Polarimeter
Source: Copernicus journal article supplement (doi:10.5194/amt-10-4235-2017), 2017-11-08
Supplement: Supplementary file 2 [file amt-10-4235-2017-supplement.zip]

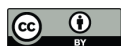

## *Supplement of*

# **Combined neural network/Phillips–Tikhonov approach to aerosol retrievals over land from the NASA Research Scanning Polarimeter**

**Antonio Di Noia et al.**

*Correspondence to:* Antonio Di Noia ([a.di.noia@sron.nl](mailto:a.di.noia@sron.nl))

- [amt-10-4235-2017-supplement-title-page.pdf](#)
- [aerosol-height-rsp\\_lut.pdf](#)
- [angstrom-exp\\_lut.pdf](#)
- [aot-440nm-rsp\\_lut.pdf](#)
- [aot-500nm-rsp\\_lut.pdf](#)
- [aot-675nm-rsp\\_lut.pdf](#)
- [aot-870nm-rsp\\_lut.pdf](#)
- [reff-fine-rsp\\_lut.pdf](#)

The copyright of individual parts of the supplement might differ from the CC BY 3.0 License.
