# Supplementary figures and images for: Combined neural network/Phillips–Tikhonov approach to aerosol retrievals over land from the NASA Research Scanning Polarimeter
Source: Copernicus journal article supplement (doi:10.5194/amt-10-4235-2017), 2017-11-08

## TOTAL AOT – 500 nm

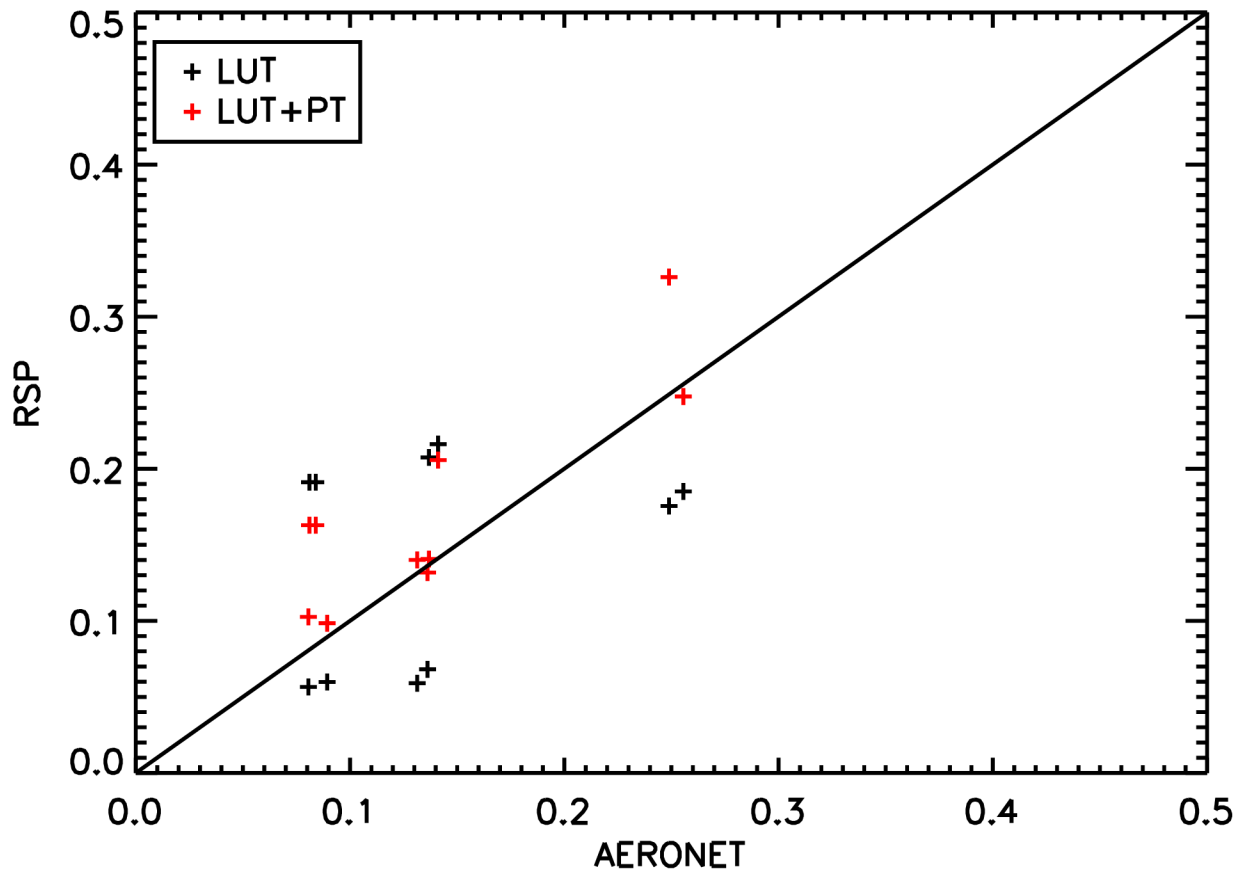

Supplement: Supplementary file 1 [file amt-10-4235-2017-supplement.zip]

## TOTAL AOT - 440 nm

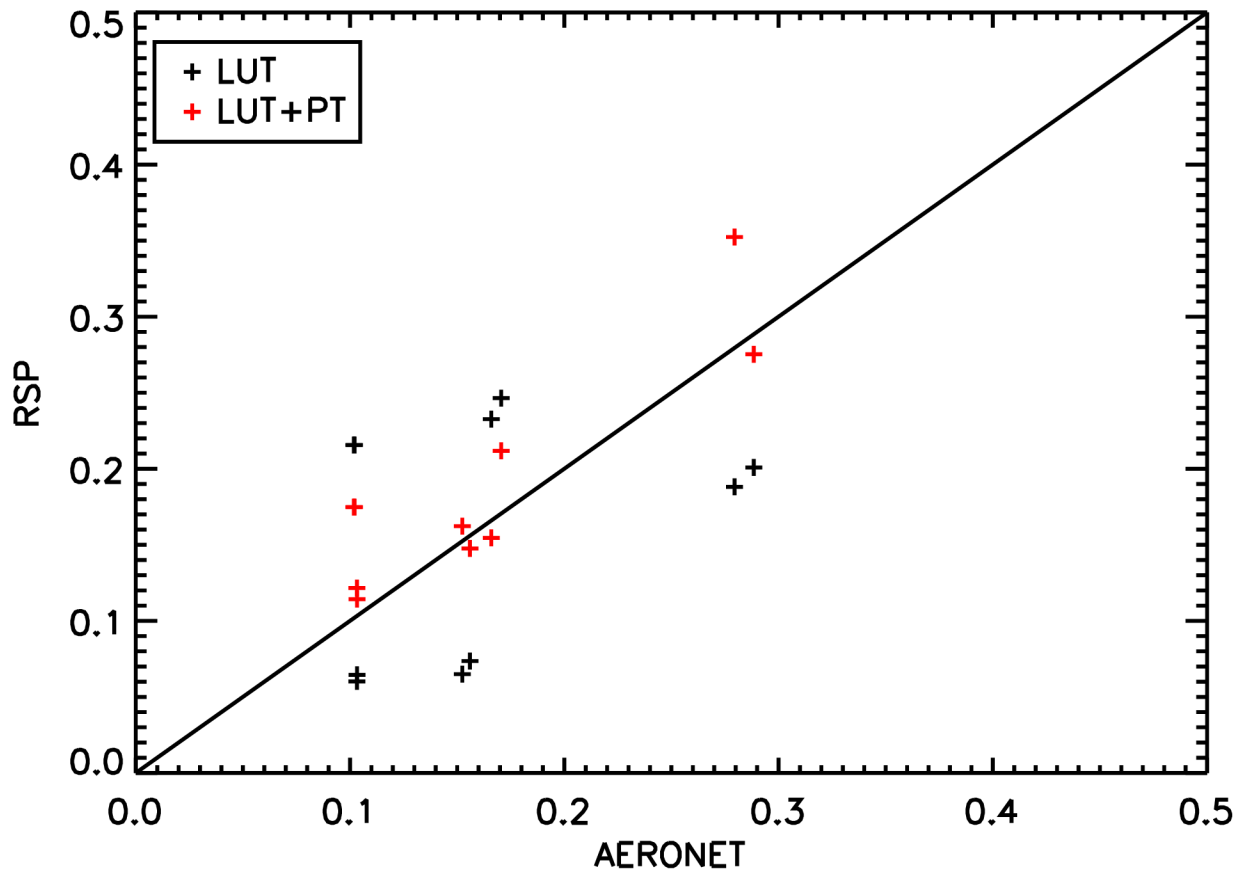

Supplement: Supplementary file 3 [file amt-10-4235-2017-supplement.zip]

# 440–675 nm ÅNGSTRÖM EXPONENT

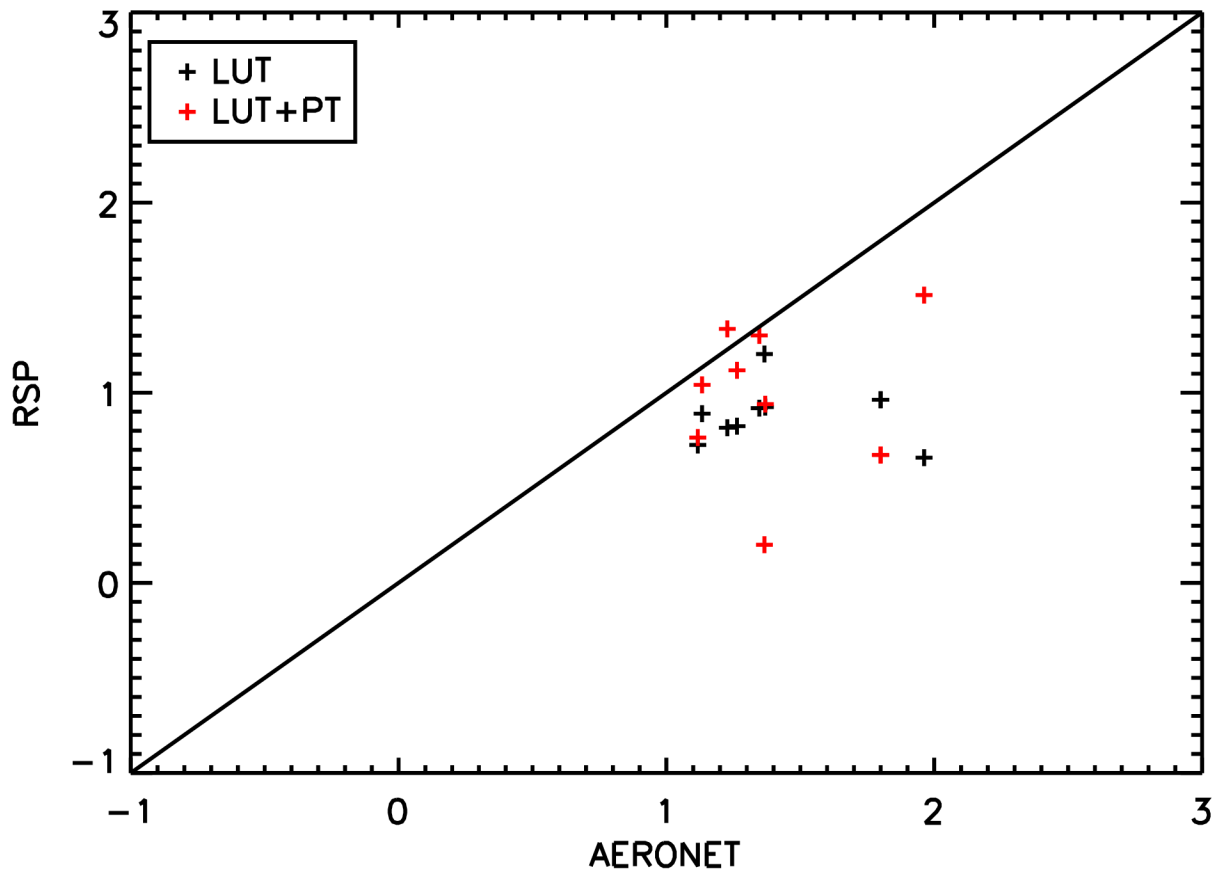

Supplement: Supplementary file 4 [file amt-10-4235-2017-supplement.zip]

# AEROSOL LAYER HEIGHT (m)

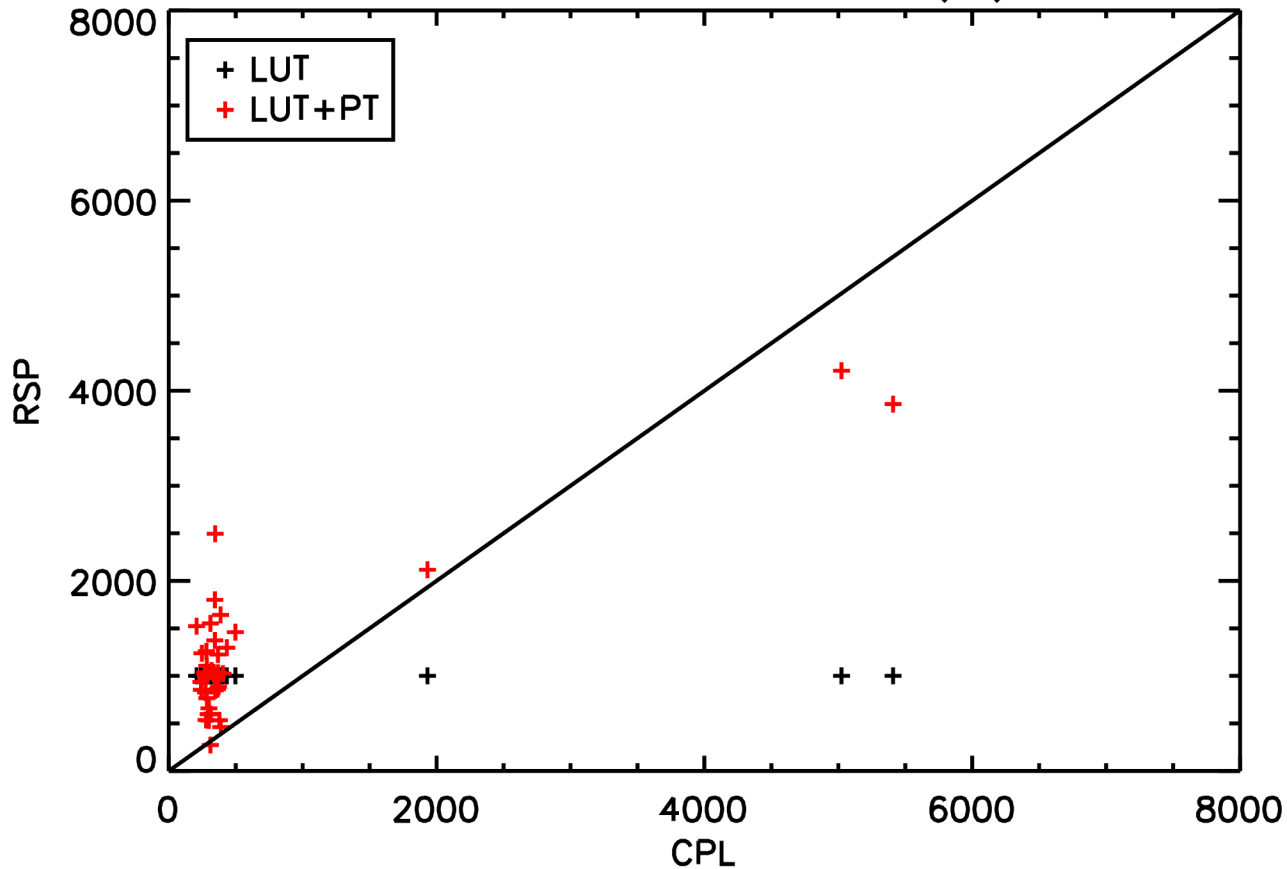

Supplement: Supplementary file 5 [file amt-10-4235-2017-supplement.zip]

# TOTAL AOT - 870 nm

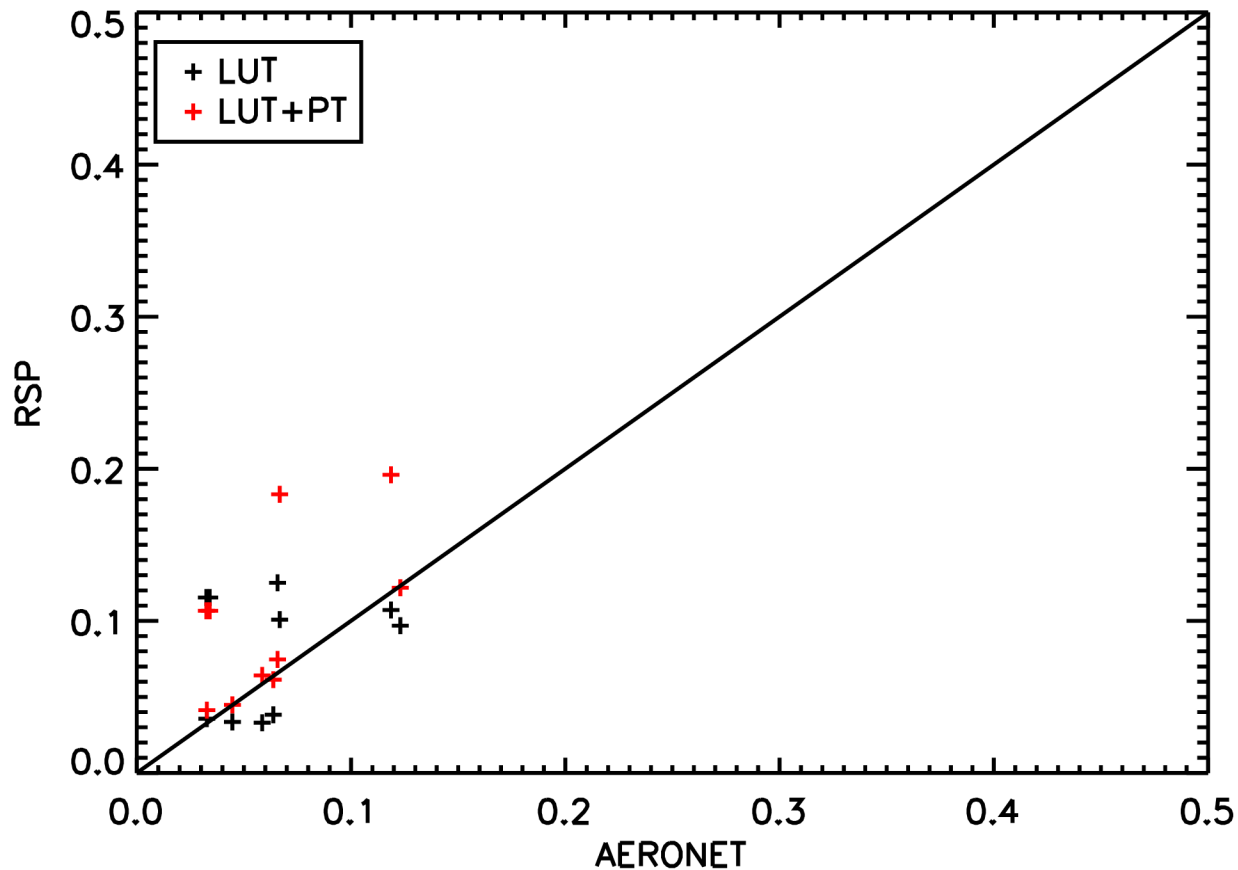

Supplement: Supplementary file 6 [file amt-10-4235-2017-supplement.zip]

FINE MODE EFF. RADIUS ( $\mu\text{m}$ )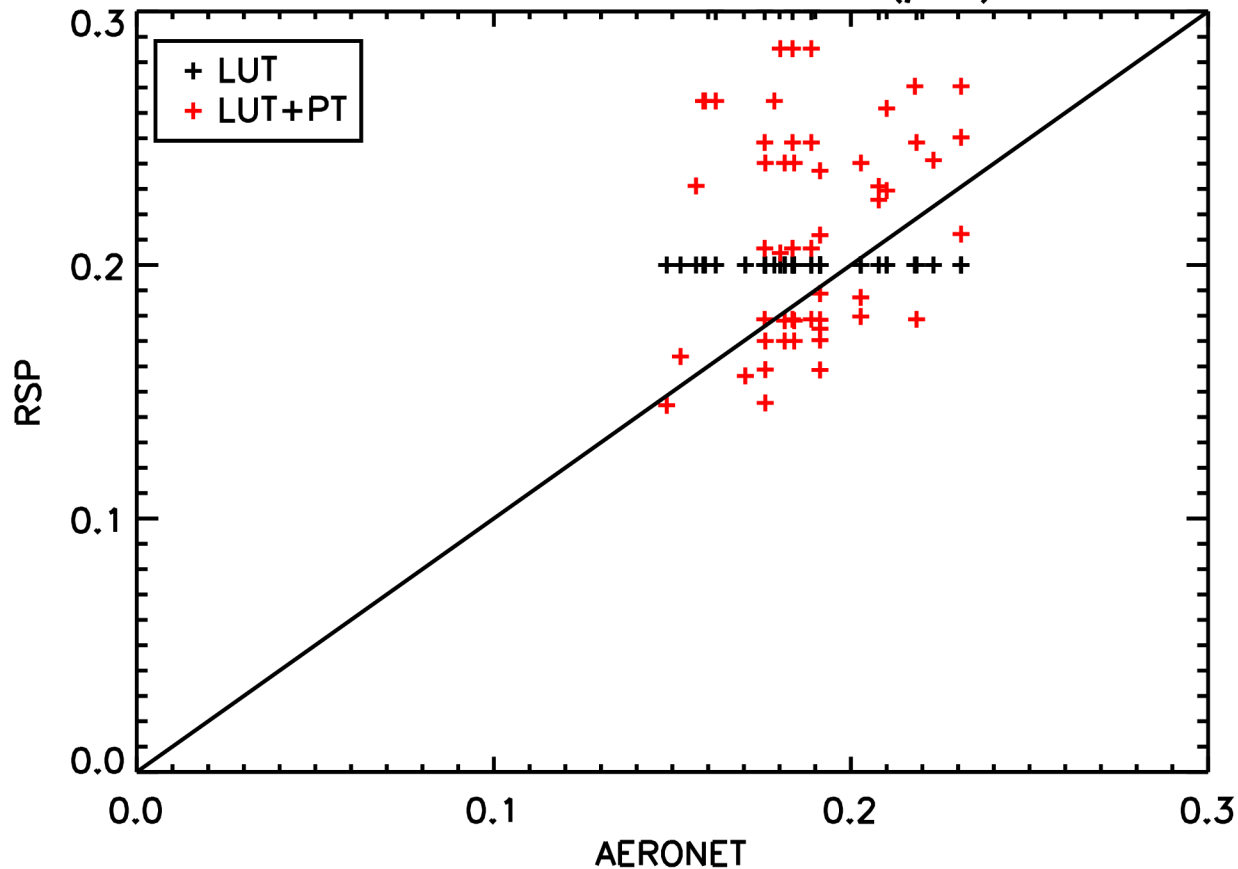

Supplement: Supplementary file 7 [file amt-10-4235-2017-supplement.zip]

## TOTAL AOT - 675 nm

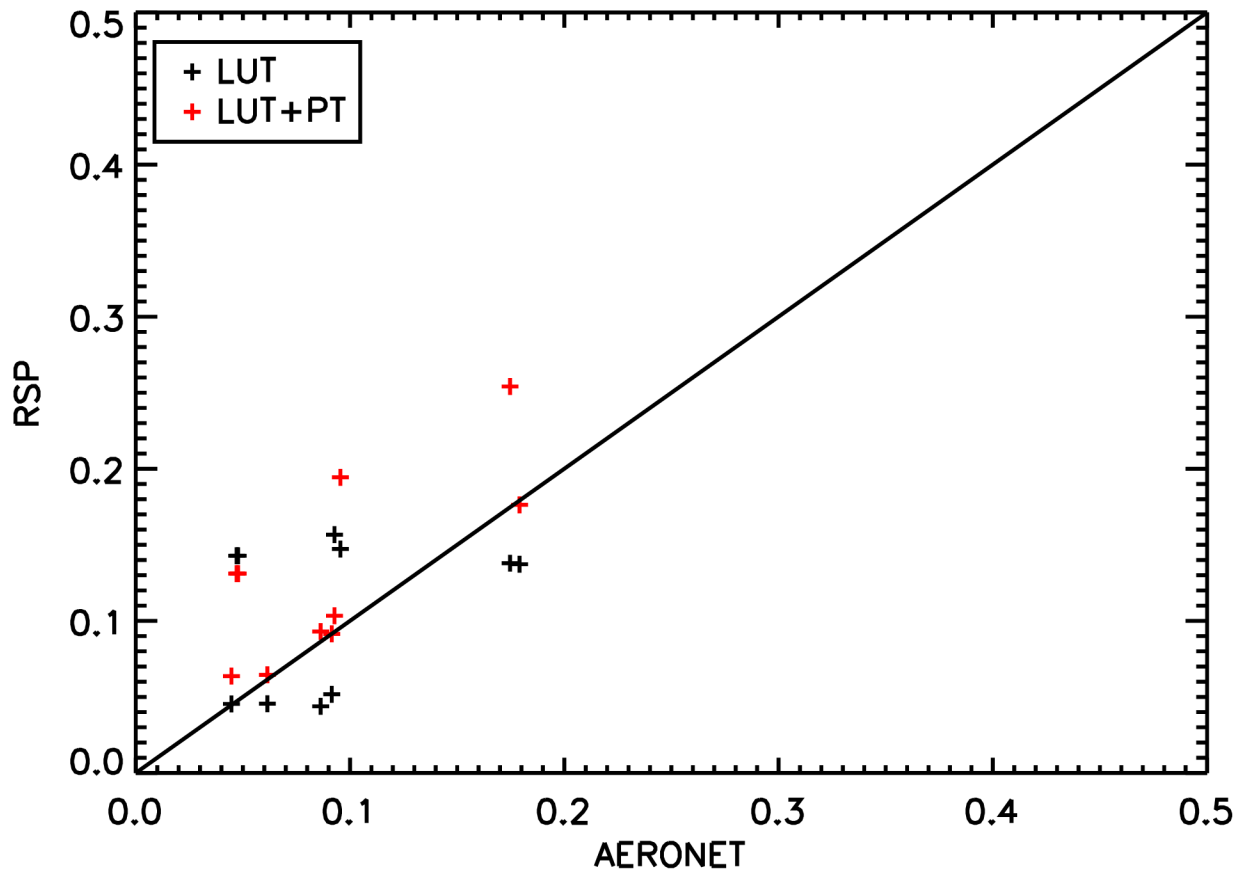

Supplement: Supplementary file 8 [file amt-10-4235-2017-supplement.zip]
